# Supplementary material
Source: PubMed Central journal article supplement (PMC6602599)
Supplement: ct9-10-e00004-s001.pdf [file ct9-10-e00004-s001.pdf]

**Supplementary table S1.** Top 50 mRNAs associated with GC death in the discovery stage

| Genes           | Cox <i>P</i> -value   | Genes           | Cox <i>P</i> -value   |
|-----------------|-----------------------|-----------------|-----------------------|
| <i>SIMI</i>     | $1.13 \times 10^{-6}$ | <i>PRKACG</i>   | $8.17 \times 10^{-4}$ |
| <i>RIMS1</i>    | $3.58 \times 10^{-5}$ | <i>ARRDC3</i>   | $8.63 \times 10^{-4}$ |
| <i>ANKRD30B</i> | $4.39 \times 10^{-5}$ | <i>ISG20L2</i>  | $8.84 \times 10^{-4}$ |
| <i>WNT9B</i>    | $4.75 \times 10^{-5}$ | <i>MCC</i>      | $9.09 \times 10^{-4}$ |
| <i>PRICKLE1</i> | $5.69 \times 10^{-5}$ | <i>SRMS</i>     | $9.22 \times 10^{-4}$ |
| <i>KCNS2</i>    | $6.83 \times 10^{-5}$ | <i>CATIP</i>    | $9.41 \times 10^{-4}$ |
| <i>PAMR1</i>    | $7.62 \times 10^{-5}$ | <i>IRPRIP</i>   | $9.47 \times 10^{-4}$ |
| <i>KCNT2</i>    | $1.16 \times 10^{-4}$ | <i>DCLK1</i>    | $9.61 \times 10^{-4}$ |
| <i>OR51G2</i>   | $1.91 \times 10^{-4}$ | <i>FLRT2</i>    | $9.78 \times 10^{-4}$ |
| <i>ZNF707</i>   | $2.01 \times 10^{-4}$ | <i>SLCO2A1</i>  | $9.94 \times 10^{-4}$ |
| <i>UPK1B</i>    | $2.20 \times 10^{-4}$ | <i>VWF</i>      | $1.03 \times 10^{-3}$ |
| <i>XG</i>       | $2.48 \times 10^{-4}$ | <i>LHX6</i>     | $1.09 \times 10^{-3}$ |
| <i>NT5E</i>     | $2.70 \times 10^{-4}$ | <i>THSD7A</i>   | $1.11 \times 10^{-3}$ |
| <i>IGFN1</i>    | $2.74 \times 10^{-4}$ | <i>PKIA</i>     | $1.12 \times 10^{-3}$ |
| <i>NEU2</i>     | $4.21 \times 10^{-4}$ | <i>TMEM120B</i> | $1.14 \times 10^{-3}$ |
| <i>H2BFWT</i>   | $4.23 \times 10^{-4}$ | <i>ZNF536</i>   | $1.14 \times 10^{-3}$ |
| <i>OR51A4</i>   | $4.63 \times 10^{-4}$ | <i>SLC39A11</i> | $1.19 \times 10^{-3}$ |
| <i>CNTN1</i>    | $5.00 \times 10^{-4}$ | <i>H2BFM</i>    | $1.20 \times 10^{-3}$ |
| <i>HOOK2</i>    | $5.73 \times 10^{-4}$ | <i>C8orf22</i>  | $1.23 \times 10^{-3}$ |
| <i>SLC25A15</i> | $6.19 \times 10^{-4}$ | <i>FAHD2B</i>   | $1.33 \times 10^{-3}$ |
| <i>GDF6</i>     | $6.22 \times 10^{-4}$ | <i>OR4K15</i>   | $1.40 \times 10^{-3}$ |
| <i>ASPHD1</i>   | $6.34 \times 10^{-4}$ | <i>KCNJ8</i>    | $1.42 \times 10^{-3}$ |
| <i>OR5H2</i>    | $6.63 \times 10^{-4}$ | <i>SPRED1</i>   | $1.47 \times 10^{-3}$ |
| <i>PDE1B</i>    | $7.29 \times 10^{-4}$ | <i>LRRC8C</i>   | $1.48 \times 10^{-3}$ |
| <i>AJ239318</i> | $7.56 \times 10^{-4}$ | <i>RPS6KA3</i>  | $1.50 \times 10^{-3}$ |

Cox *P*-value for each gene was obtained from the multivariate Cox regression adjusting for age and gender.

Genes with Cox *P*-value  $< 5 \times 10^{-3}$  was considered to be associated with GC death.

**Supplementary table S2.** The correlation between mRNA expression values and corresponding methylation levels <sup>a</sup>

| Genes         | CpG loci   | Chromosome | Start     | End       | Correlation coefficient <sup>b</sup> | P-value                |
|---------------|------------|------------|-----------|-----------|--------------------------------------|------------------------|
| <i>ASPHD1</i> | cg08515989 | chr16      | 29901583  | 29901584  | - 0.73                               | $1.68 \times 10^{-56}$ |
|               | cg09328356 | chr16      | 29901841  | 29901842  | - 0.71                               | $1.10 \times 10^{-52}$ |
|               | cg10093648 | chr16      | 29901379  | 29901380  | - 0.57                               | $3.09 \times 10^{-30}$ |
|               | cg05192831 | chr16      | 29901686  | 29901687  | - 0.53                               | $9.75 \times 10^{-26}$ |
|               | cg02488299 | chr16      | 29901902  | 29901903  | - 0.48                               | $1.08 \times 10^{-20}$ |
| <i>PKIA</i>   | cg09043127 | chr8       | 78516209  | 78516210  | - 0.54                               | $6.63 \times 10^{-27}$ |
|               | cg27140220 | chr8       | 78516199  | 78516200  | - 0.52                               | $1.10 \times 10^{-24}$ |
| <i>NT5E</i>   | cg27297263 | chr6       | 85450750  | 85450751  | - 0.49                               | $2.37 \times 10^{-21}$ |
|               | cg21730993 | chr6       | 85449492  | 85449493  | - 0.47                               | $1.70 \times 10^{-19}$ |
|               | cg27039625 | chr6       | 85449378  | 85449379  | - 0.43                               | $1.43 \times 10^{-16}$ |
|               | cg10663055 | chr6       | 85449533  | 85449534  | - 0.40                               | $1.74 \times 10^{-14}$ |
|               | cg13315970 | chr6       | 85449479  | 85449480  | - 0.45                               | $6.68 \times 10^{-18}$ |
| <i>GHR</i>    | cg07237214 | chr5       | 42424502  | 42424503  | - 0.44                               | $5.95 \times 10^{-17}$ |
|               | cg18160072 | chr5       | 42424323  | 42424324  | - 0.41                               | $7.25 \times 10^{-15}$ |
|               | cg03836184 | chr5       | 42424736  | 42424737  | - 0.41                               | $2.70 \times 10^{-15}$ |
| <i>ERG</i>    | cg06032349 | chr21      | 38660407  | 38660408  | - 0.44                               | $1.16 \times 10^{-17}$ |
| <i>CDOI</i>   | cg18520851 | chr5       | 115813492 | 115813493 | 0.40                                 | $1.97 \times 10^{-14}$ |

<sup>a</sup> mRNAs were significantly associated with GC death at  $P < 5 \times 10^{-3}$  in TCGA. CpG loci were significantly associated with GC death at  $P < 0.05$  in TCGA.

<sup>b</sup> The correlation coefficients between mRNA expression and encoding gene methylation were obtained with performing spearman correlation analysis. Correlation  $P$  values  $< 0.05$  and the absolute value of coefficient  $> 0.4$  were set as the cut-off criteria defining meaningful methylation-expression associations.

**Supplementary table S3.** Candidate mRNAs went for validation study (GSE84437)

| Description                                                                                                    | Genes                                                                                                                                                                                                                                                                    |
|----------------------------------------------------------------------------------------------------------------|--------------------------------------------------------------------------------------------------------------------------------------------------------------------------------------------------------------------------------------------------------------------------|
| Genes which ranked among the most significant survival-associated genes in TCGA ( $P < 1.00 \times 10^{-4}$ )  | <i>SIM1, RIMS1, ANKRD30B, WNT9B, PRICKLE1, KCNS2, PAMR1, KCNT2, OR51G2, ZNF707, UPK1B, XG, NT5E, IGFN1, NEU2, H2BFWT, OR51A4, CNTN1, HOOK2, SLC25A15, GDF6, ASPHD1, OR5H2, PDE1B, AJ239318, PRKACG, ARRDC3, ISG20L2, MCC, SRMS, CATIP, ITPRIP, DCLK1, FLRT2, SLCO2A1</i> |
| Genes whose both mRNA expression values and methylation levels were significantly associated with GC prognosis | <i>ASPHD1, CDO1, ERG, GHR, NT5E, PKIA</i>                                                                                                                                                                                                                                |
| Genes which were included in significant sub-networks <sup>a</sup>                                             | <i>VMF, SELP, CD36, CD44, CD109</i>                                                                                                                                                                                                                                      |

<sup>a</sup> The plugin software ClusterOne was applied to detect significant models which may represent molecular complexes in PPI network associated with poor GC survival (Minimum size = 5, Minimum density = 0.6, Edge weights = unweight).

**Supplementary table S4.** The enriched GO terms of the 184 genes which encode mRNAs associated with GC death in TCGA at  $P < 5 \times 10^{-3}$

| Category | ID         | Description                                                            | P-value              | Gene count |
|----------|------------|------------------------------------------------------------------------|----------------------|------------|
| BP       | GO:0001525 | Angiogenesis                                                           | $4.2 \times 10^{-3}$ | 8          |
|          | GO:0050731 | Positive regulation of peptidyl-tyrosine phosphorylation               | $6.5 \times 10^{-3}$ | 5          |
|          | GO:0007165 | Signal transduction                                                    | $1.8 \times 10^{-2}$ | 19         |
|          | GO:0007159 | Leukocyte cell-cell adhesion                                           | $2.1 \times 10^{-2}$ | 3          |
|          | GO:0035556 | Intracellular signal transduction                                      | $3.0 \times 10^{-2}$ | 9          |
|          | GO:0007204 | Positive regulation of cytosolic calcium ion concentration             | $3.4 \times 10^{-2}$ | 5          |
|          | GO:0050911 | Detection of chemical stimulus involved in sensory perception of smell | $4.0 \times 10^{-2}$ | 9          |
|          | GO:0007040 | Lysosome organization                                                  | $4.2 \times 10^{-2}$ | 3          |
| CC       | GO:0008076 | Voltage-gated potassium channel complex                                | $6.8 \times 10^{-3}$ | 5          |
|          | GO:0005886 | Plasma membrane                                                        | $9.9 \times 10^{-3}$ | 49         |
|          | GO:0005887 | Integral component of plasma membrane                                  | $1.7 \times 10^{-2}$ | 21         |
|          | GO:0008282 | ATP-sensitive potassium channel complex                                | $2.5 \times 10^{-2}$ | 2          |
|          | GO:0045121 | Membrane raft                                                          | $3.2 \times 10^{-2}$ | 6          |
|          | GO:0070695 | FHF complex                                                            | $4.2 \times 10^{-2}$ | 2          |
| MF       | GO:0017046 | Peptide hormone binding                                                | $2.4 \times 10^{-2}$ | 3          |
|          | GO:0004984 | Olfactory receptor activity                                            | $4.0 \times 10^{-2}$ | 9          |

$P < 0.05$  was considered as threshold value of significant difference.

Abbreviations: GO, gene ontology; BP, biological process; MF, molecular function; CC, cellular component.

**Supplementary table S5.** Top 20 enriched pathways of the 184 genes which encode mRNAs associated with GC death in TCGA at  $P < 5 \times 10^{-3}$

| Pathway ID   | Description                                  | <i>P</i> -value      | Gene count |
|--------------|----------------------------------------------|----------------------|------------|
| R-HSA-162582 | Signal Transduction                          | $1.4 \times 10^{-6}$ | 29         |
| R-HSA-372790 | Signaling by GPCR                            | $3.7 \times 10^{-6}$ | 19         |
| hsa04740     | Olfactory transduction                       | $3.8 \times 10^{-6}$ | 11         |
| R-HSA-112316 | Neuronal System                              | $1.6 \times 10^{-4}$ | 8          |
| R-HSA-212676 | Dopamine Neurotransmitter Release Cycle      | $1.8 \times 10^{-4}$ | 3          |
| hsa04924     | Renin secretion                              | $2.4 \times 10^{-4}$ | 4          |
| R-HSA-381753 | Olfactory Signaling Pathway                  | $3.1 \times 10^{-4}$ | 8          |
| R-HSA-388396 | GPCR downstream signaling                    | $3.4 \times 10^{-4}$ | 13         |
| R-HSA-447043 | Neurofascin interactions                     | $6.8 \times 10^{-4}$ | 2          |
| hsa04916     | Melanogenesis                                | $1.2 \times 10^{-3}$ | 4          |
| P02771       | Pyrimidine Metabolism                        | $1.2 \times 10^{-3}$ | 2          |
| hsa05034     | Alcoholism                                   | $1.4 \times 10^{-3}$ | 5          |
| hsa04340     | Hedgehog signaling pathway                   | $1.4 \times 10^{-3}$ | 3          |
| R-HSA-112310 | Neurotransmitter Release Cycle               | $1.7 \times 10^{-3}$ | 3          |
| R-HSA-109582 | Hemostasis                                   | $1.7 \times 10^{-3}$ | 9          |
| R-HSA-373760 | L1CAM interactions                           | $2.0 \times 10^{-3}$ | 4          |
| hsa05217     | Basal cell carcinoma                         | $2.2 \times 10^{-3}$ | 3          |
| hsa05203     | Viral carcinogenesis                         | $2.5 \times 10^{-3}$ | 5          |
| R-HSA-112315 | Transmission across Chemical Synapses        | $2.6 \times 10^{-3}$ | 5          |
| R-HSA-264642 | Acetylcholine Neurotransmitter Release Cycle | $2.8 \times 10^{-3}$ | 2          |

The online tool KOBAS was applied to perform pathway enrichment analysis.

$P < 0.05$  was considered as threshold value of significant difference.

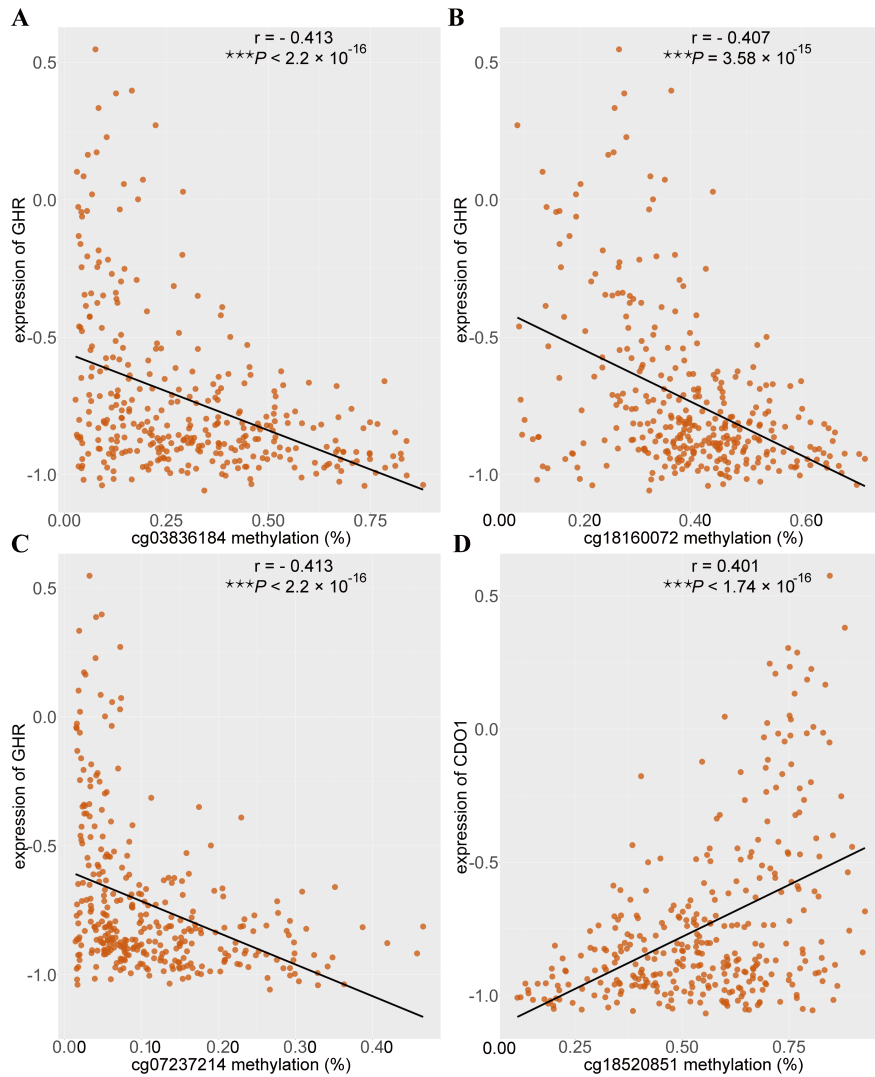

**Supplementary Figure S1.** Spearman correlation between mRNA expression values and corresponding methylation levels in the discovery stage. Correlation  $P < 0.05$  and the absolute value of coefficient  $> 0.4$  were set as the cut-off criteria defining meaningful methylation-expression associations. (A-C) The correlations of *GHR*. (D) The correlation of *CDOI*.
